# Supplementary material
Source: publisher site journal article supplement (https://www.dovepress.com/article/311844)
Supplement: Supplementary file 1 [file get_supplementary_file.php]

**US Health Resource Utilization and Cost Burden Associated With Choroideremia**

**SUPPLEMENTAL MATERIAL**

**Supplemental Table 1.** Patient selectiona

| **Criteria, n** | **All payors** | **Commercial** | **Medicare** | **Medicaid** |
| --- | --- | --- | --- | --- |
| IBM MarketScan Database (Armonk, NY) from 01/01/2013 to 12/31/2018 | 117 million | 90 million | 60 million | 21 million |
| ≥1 choroideremia-specific ICD-9/10   diagnostic code (363.55 or H31.21) | 386 | 267 | 60 | 59 |
| ≥1 choroideremia-specific ICD-9/10   diagnostic code and continuous   enrollment ≥6 mo before index | 263 | 178 | 42 | 43 |
| Continuous enrollment ≥6 mo postindex | 207 | 135 | 34 | 38 |

**Note:** aPatient selection criteria before matching to control cohort.

**Abbreviation:** ICD-9/10, *International Classification of Diseases, Ninth or Tenth Edition.*

**Supplemental** **Table 2.** Baseline characteristics and annualized costs in individuals with choroideremia, by sex

|  | **Individuals with choroideremia (N=199)** | | |
| --- | --- | --- | --- |
|  | **Males**  **(n=131)** | **Females**  **(n=68)** | **p value** |
| Baseline characteristics |  |  |  |
| Age, mean (SD), y | 41.8 (22.6) | 52.0 (20.4) | 0.0021 |
| Region, n (%) |  |  | 0.3459 |
| Northeast | 23 (18) | 15 (22) |  |
| North Central | 27 (21) | 13 (19) |  |
| South | 32 (24) | 23 (34) |  |
| West | 21 (16) | 9 (13) |  |
| Unknown | 28 (21) | 8 (12) |  |
| Payor, n (%) |  |  | 0.1011 |
| Commercial | 86 (66) | 45 (66) |  |
| Medicaid | 28 (21) | 8 (12) |  |
| Medicare supplemental | 17 (13) | 15 (22) |  |
| CCI, mean (SD)a | 0.43 (0.86) | 0.54 (0.92) | 0.3769 |
| CCI group, n (%)  0  1  2  3  ≥4 | 96 (73)  21 (16)  10 (8)  2 (2)  2 (2) | 45 (66)  14 (21)  5 (7)  3 (4)  1 (1) | 0.6742 |
| Total cost per patient, LSM | $17,669 | $18,522 | 0.8837 |
| Inpatient admissions | $3,617 | $4,983 | 0.6689 |
| Outpatient visits | $10,592 | $7,539 | 0.4967 |
| Emergency department visits | $508 | $3,654 | 0.0276 |
| Pharmacy prescriptions | $2,952 | $2,346 | 0.5910 |

**Note:** aCCI based on data 6 months before the index.

**Abbreviations:** CCI, Charlson Comorbidity Index; LSM, least squares mean; SD, standard deviation*.*

**Supplemental Figure 1.** Postindex comorbidities by percentage of difference between the choroideremia and control cohorts (all odds ratios shown, p < 0.05).


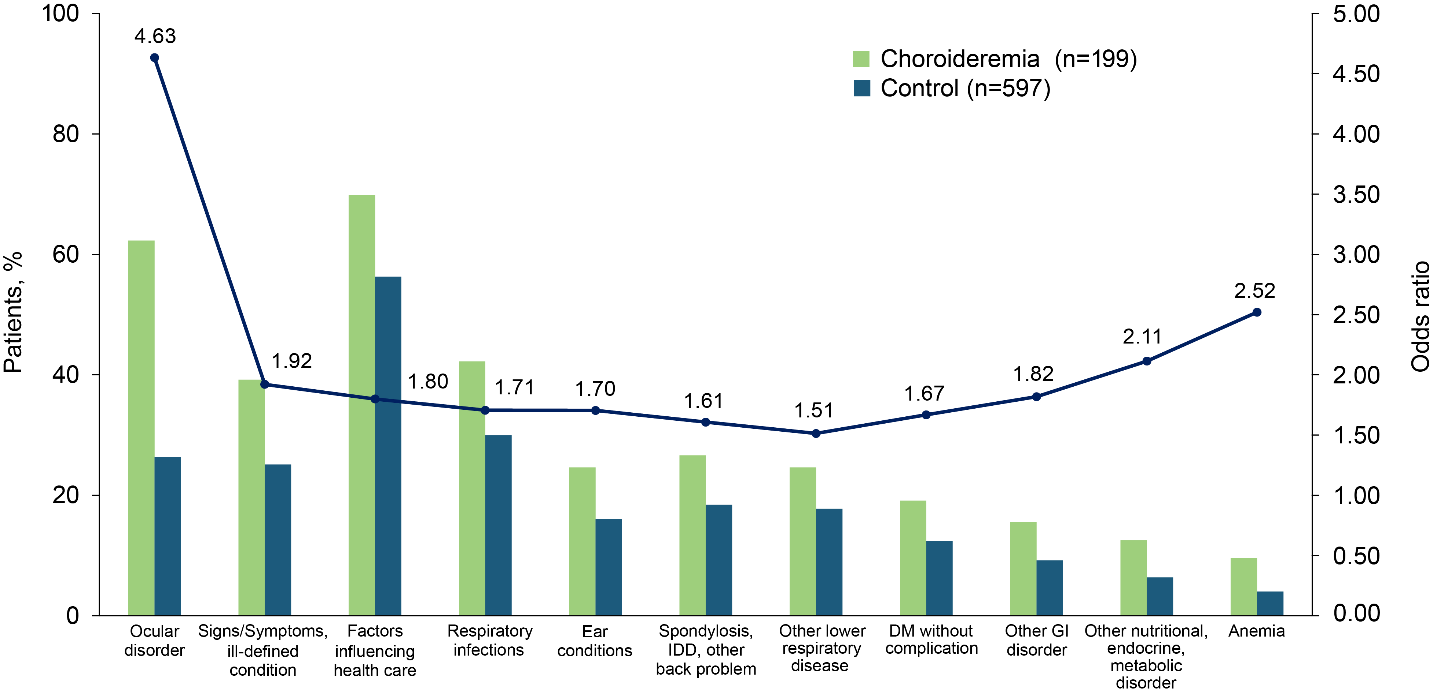


**Abbreviations:** DM, diabetes mellitus; GI, gastrointestinal; IDD, intervertebral disc disorder.
